# Supplementary material for: Functional Characterisation of Two Novel Deacetylases from Streptococcus pyogenes
Source: MDPI journal article supplement (doi:10.3390/microbiolres13020025), 2022-06-07
Supplement: s1 [file s1]

# Supplementary Figure S1

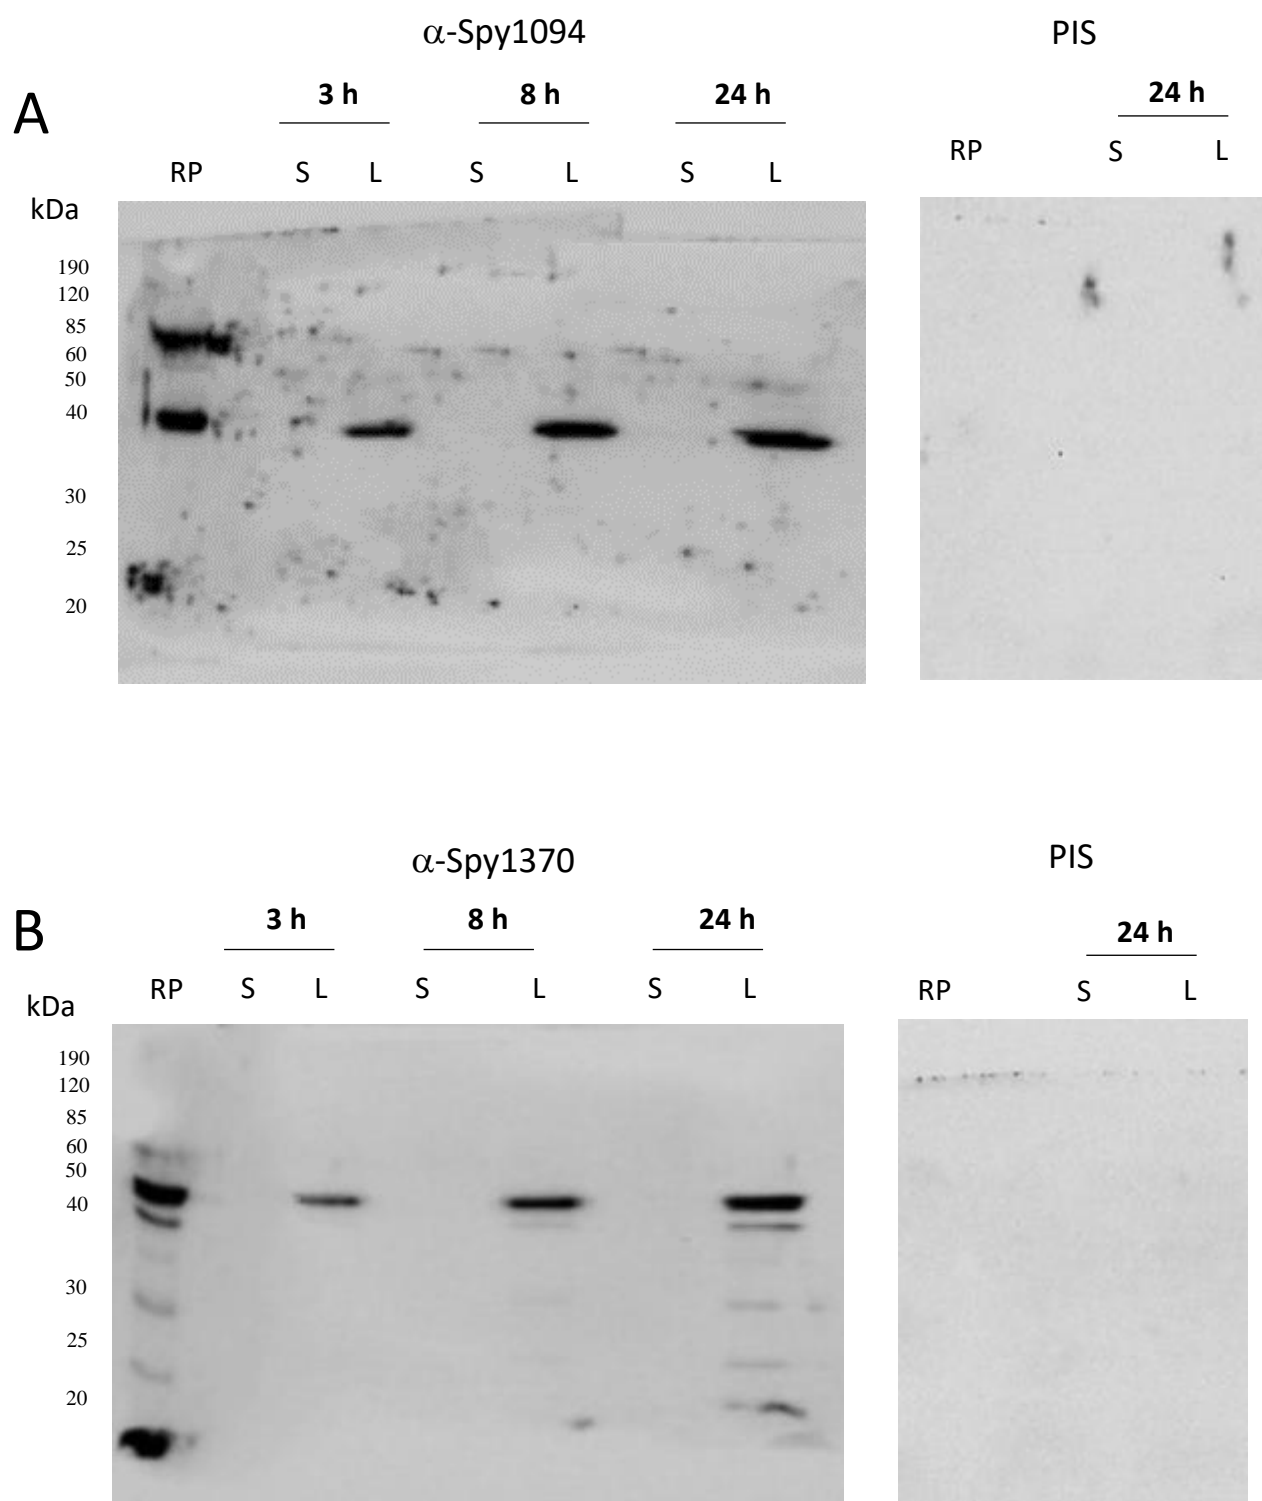

Figure S1: Expression of Spy1094 and Spy1370 during in vitro bacterial growth (the complete (uncropped) Western blot). (A) Spy 1094; (B) Spy 1370.
